# Supplementary material
Source: PubMed Central journal article supplement (PMC7941481)
Supplement: CNR2-3-e1164-s008.pdf [file CNR2-3-e1164-s008.pdf]

# Supplemental Figure 1: RhoA and RhoC RNA levels are not affected by altering RhoB expression.

1A

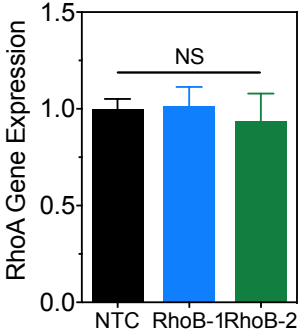

1B

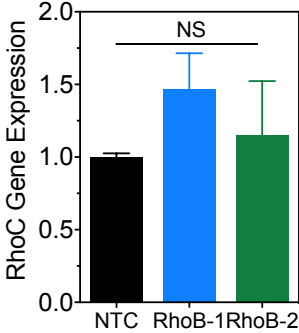

1C

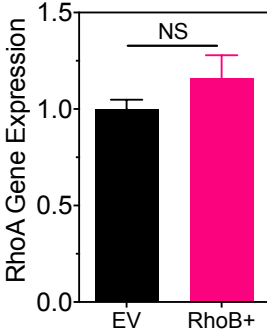

1D

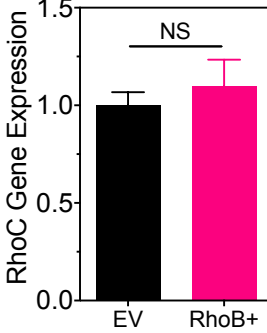

# Supplemental Figure 2: Altering RhoB expression does not affect cell morphologies.

2A

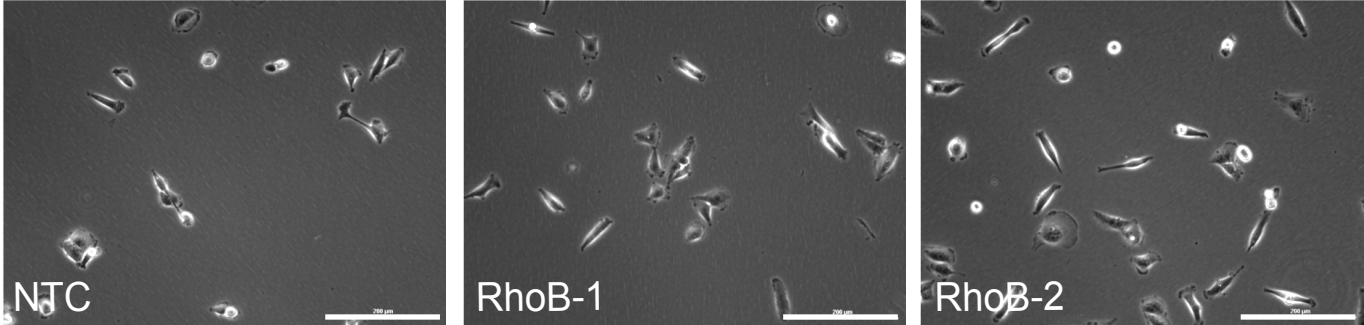

2B

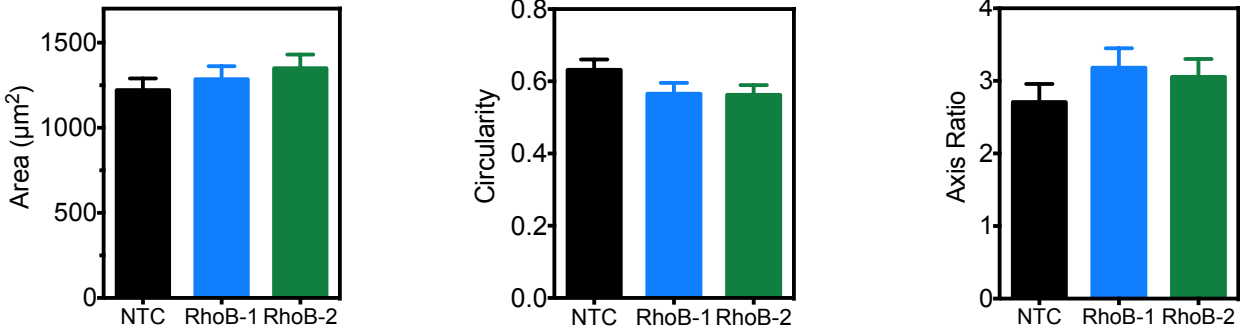

2C

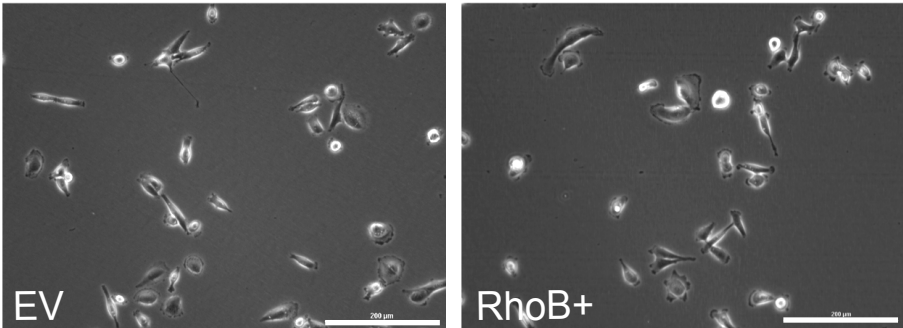

2D

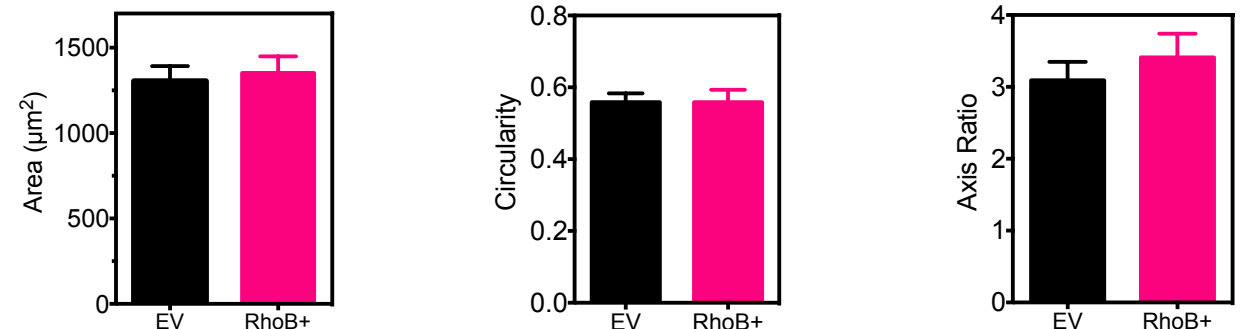

**Supplemental Figure 3: Hypoxia increases spheroid invasion and migration.**

3A

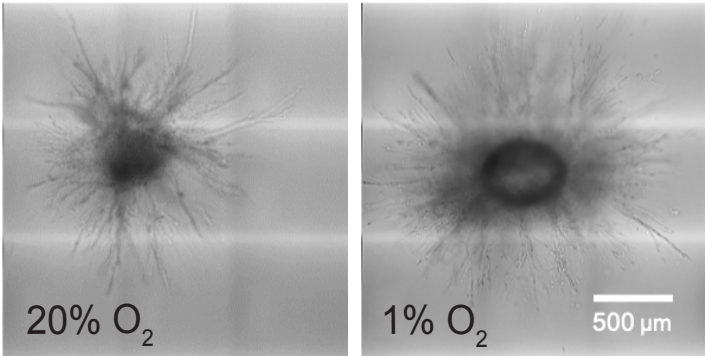

3B

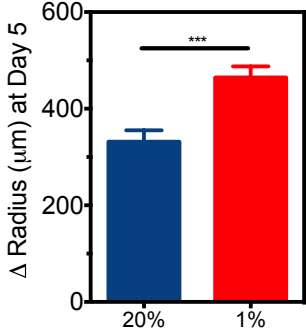

# Supplemental Figure 4: RhoB knockdown does not affect migration or invasion in spheroids.

4A

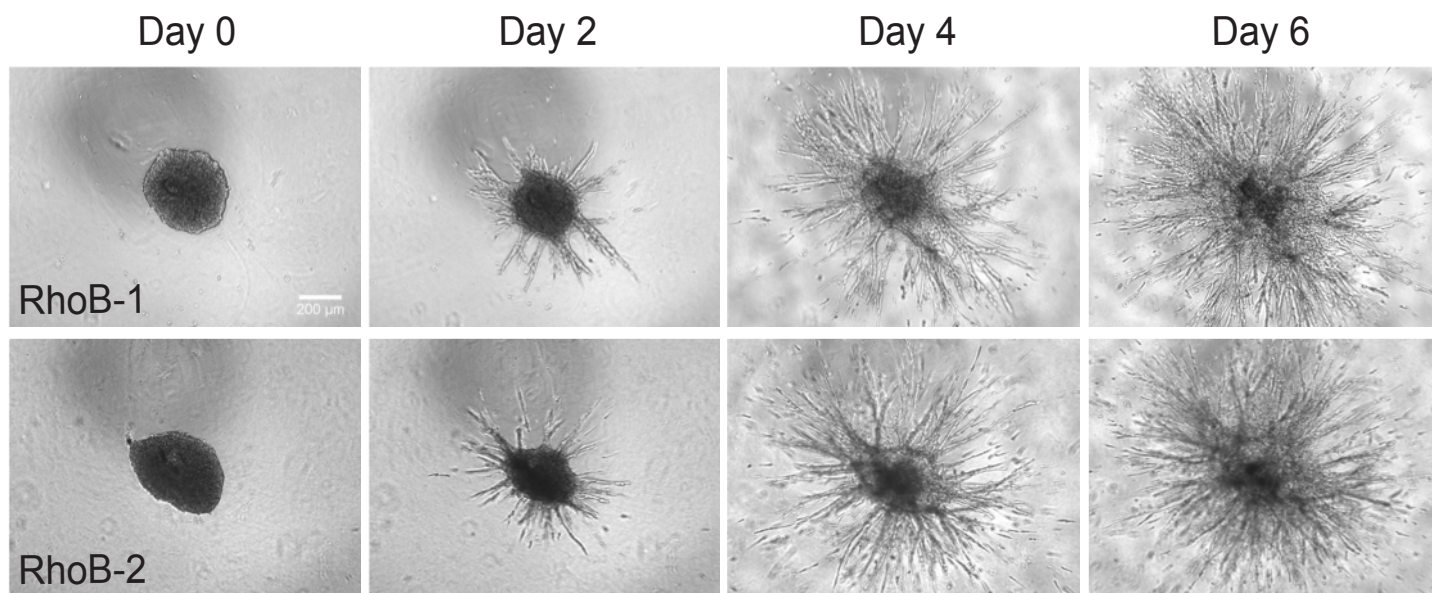

4B

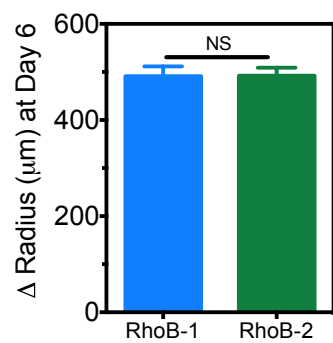

**Supplemental Figure 5: Thresholding method to quantify stained areas.**

5A

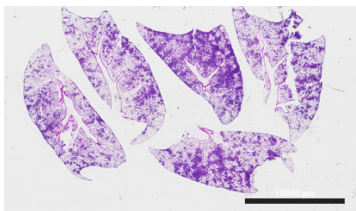

H&E Color Deconvolution

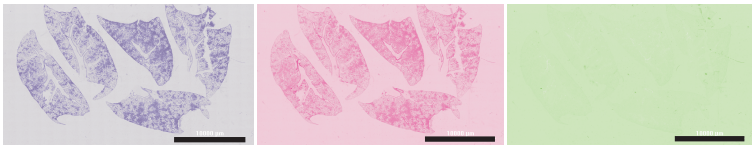

Threshold

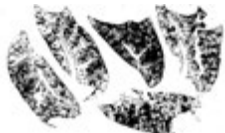

Region of Interest

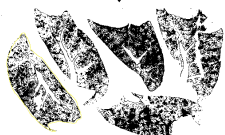

Measure % Area

5B

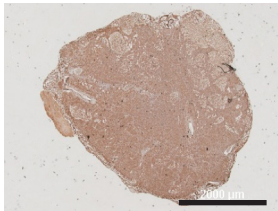

H DAB Color Deconvolution

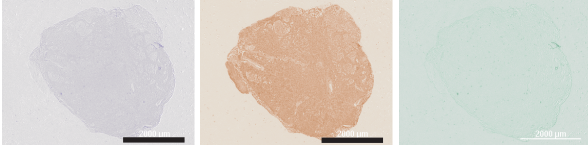

Threshold

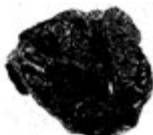

Region of Interest

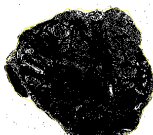

Measure % Area
